# Supplementary material for: Effect of Cognitive Reserve on Risk of Cognitive Impairment and Recovery After Stroke: The KOSCO Study
Source: PubMed Central journal article supplement — Stroke. 2019 Dec 11;51(1):99–107. doi: 10.1161/STROKEAHA.119.026829 (PMC6924936; doi:10.1161/strokeaha.119.026829), 2019-12-11
Supplement: str-51-099-s001.pdf [file str-51-099-s001.pdf]

## SUPPLEMENTAL MATERIAL

### Effect of Cognitive Reserve on Risk of Cognitive Impairment and Recovery After Stroke: The KOSCO Study

Minyoung Shin, PhD,<sup>1,2</sup> Min Kyun Sohn, MD, PhD,<sup>3</sup> Jongmin Lee, MD, PhD,<sup>4</sup> Deog Young Kim, MD, PhD,<sup>5</sup> Sam-Gyu Lee, MD, PhD,<sup>6</sup> Yong-II Shin, MD, PhD,<sup>7</sup> Gyung-Jae Oh, MD, PhD,<sup>8</sup> Yang-Soo Lee, MD, PhD,<sup>9</sup> Min Cheol Joo, MD, PhD,<sup>10</sup> Eun Young Han, MD, PhD,<sup>11</sup> Junhee Han, PhD,<sup>12</sup> Jeonghoon Ahn, PhD,<sup>13</sup> Won Hyuk Chang, MD, PhD,<sup>1</sup> Min A Shin, MD,<sup>1</sup> Ji Yoo Choi, MS,<sup>14</sup> Sung Hyun Kang, PhD,<sup>14</sup> Youngtaek Kim, MD,<sup>14</sup> Yun-Hee Kim, MD, PhD<sup>1,15,\*</sup>

<sup>1</sup>Department of Physical and Rehabilitation Medicine, Center for Prevention and Rehabilitation, Heart Vascular Stroke Institute, Samsung Medical Center, Sungkyunkwan University School of Medicine, Seoul, Republic of Korea; <sup>2</sup>Department of Counseling Psychology, Yongmoon Graduate School of Counseling Psychology, Seoul, Republic of Korea; <sup>3</sup>Department of Rehabilitation Medicine, School of Medicine, Chungnam National University, Daejeon, Republic of Korea; <sup>4</sup>Department of Rehabilitation Medicine, Konkuk University School of Medicine, Seoul, Republic of Korea; <sup>5</sup>Department and Research Institute of Rehabilitation Medicine, Yonsei University College of Medicine, Seoul, Republic of Korea; <sup>6</sup>Department of Physical and Rehabilitation Medicine, Chonnam National University Medical School, Kwangju, Republic of Korea; <sup>7</sup>Department of Rehabilitation Medicine, Pusan National University School of Medicine, Pusan National University Yangsan Hospital, Yangsan, Republic of Korea; <sup>8</sup>Department of Preventive Medicine, Wonkwang University, School of Medicine, Iksan, Republic of Korea; <sup>9</sup>Department of Rehabilitation Medicine, Kyungpook National University School of Medicine, Kyungpook National University Hospital, Daegu, Republic of Korea; <sup>10</sup>Department of Rehabilitation Medicine, Wonkwang University School of Medicine, Iksan, Republic of Korea; <sup>11</sup>Department of Rehabilitation Medicine, Jeju National University School of Medicine, Jeju, Republic of Korea; <sup>12</sup>Department of Statistics, Hallym University, Chunchon, Republic of Korea; <sup>13</sup>Department of Health Convergence, Ewha Womans University, Seoul, Republic of Korea; <sup>14</sup>Division of Chronic Disease Prevention, Center for Disease Prevention, Korea Centers for Disease Control and Prevention, Osong, Republic of Korea; <sup>15</sup>Department of Health Science and Technology, Department of Medical Device Management and Research, Department of Digital Healthcare, SAIHST, Sungkyunkwan University, Seoul, Republic of Korea

\*Correspondence and reprint requests:

Yun-Hee Kim, MD, PhD, Department of Physical and Rehabilitation Medicine, Center for Prevention and Rehabilitation, Heart Vascular Stroke Institute, Samsung Medical Center, Sungkyunkwan University School of Medicine, Department of Health Science and Technology, Department of Medical Device Management and Research, Department of Digital Healthcare, SAIHST, Sungkyunkwan University, 81 Irwon-ro, Gangnam-gu, Seoul, 06351, Republic of Korea.

Tel: 82-2-3410-2824

E-mail: [yun1225.kim@samsung.com](mailto:yun1225.kim@samsung.com), [yunkim@skku.edu](mailto:yunkim@skku.edu);

Cover title: Cognitive Impairment and Recovery After Stroke

Total number of tables and figures: Tables 3 and Figures 3.

Key words: Stroke, Cognitive Recovery, Cognitive Reserve, Longitudinal Study, Multi-level Analysis

Subject terms: Cerebrovascular Disease/Stroke, Cognitive Impairment, Risk Factors

## Methods

### Statistical Analysis

A multi-level model is appropriate for nested data in which observations are organized at more than one level.<sup>1</sup> Observations in our data, i.e., the K-MMSE scores, are nested within individuals. Because the clinical features of cognitive impairment in stroke patients are characterized by a rapid improvement at the initial stage and subsequent stable maintenance,<sup>2</sup> an exponential function,  $K\text{-MMSE} = \beta_0 + \beta_1 \times e^{-Time} + \varepsilon$ , in which *Time* is months after stroke onset, was applied first to see the natural course of recovery. We then reanalyzed the data using a linear regression function with two different slopes (piecewise regression) during the initial active stage and later stable stage to clarify the clinical meanings of the coefficients because the coefficients of the exponential function are difficult to interpret directly. This procedure was expected to improve our understanding of the course of cognitive recovery in stroke patients. In the piecewise regression model, we set the breakpoint to 3 months based on the graph derived from the exponential model. The piecewise regression function was as follows:  $K\text{-MMSE} = \beta_0 + \beta_1 \times Time_1 + \beta_2 \times Time_2 + \varepsilon$ , in which  $Time_1$  was coded as 0, 1, 3, 3, 3, 3, 3, 3, and  $Time_2$  was coded as 0, 0, 0, 3, 9, 15, 21, 27. Education and occupation were coded as dummy variables, and the composite CR score was used as a continuous variable.

Table I. Number of cases followed up at each time point by educational and occupational group

|           | Education           |                   |                     |                  |             | Occupation    |                    |                |                         |             |
|-----------|---------------------|-------------------|---------------------|------------------|-------------|---------------|--------------------|----------------|-------------------------|-------------|
|           | No formal education | Primary education | Secondary education | Higher education | Total       | No occupation | Non-skilled manual | Skilled manual | Manager or professional | Total       |
| Total N†  | 671 (100)           | 1,841 (100)       | 3,379 (100)         | 1,465 (100)      | 7,356 (100) | 1,862 (100)   | 228 (100)          | 2,031 (100)    | 548 (100)               | 4,669 (100) |
| 7 days    | 632 (94)            | 1,741 (95)        | 3,226 (95)          | 1,415 (97)       | 7,014 (95)  | 1,758 (94)    | 215 (94)           | 1,946 (96)     | 525 (96)                | 4,444 (95)  |
| Discharge | 648 (97)            | 1,769 (96)        | 3,272 (97)          | 1,431 (98)       | 7,120 (97)  | 1,790 (96)    | 223 (98)           | 1,975 (97)     | 537 (98)                | 4,525 (97)  |
| 3 months  | 453 (68)            | 1,299 (71)        | 2,500 (74)          | 1,102 (75)       | 5,354 (73)  | 1,640 (88)    | 209 (92)           | 1,849 (91)     | 498 (91)                | 4,196 (90)  |
| 6 months  | 399 (59)            | 1,212 (66)        | 2,360 (70)          | 1,043 (71)       | 5,014 (68)  | 1,568 (84)    | 201 (88)           | 1,801 (89)     | 472 (86)                | 4,042 (87)  |
| 12 months | 368 (55)            | 1,155 (63)        | 2,237 (66)          | 1,018 (69)       | 4,778 (65)  | 1,400 (75)    | 189 (83)           | 1,668 (82)     | 438 (80)                | 3,695 (79)  |
| 18 months | 373 (56)            | 1,098 (60)        | 2,164 (64)          | 1,007 (69)       | 4,642 (63)  | 1,344 (72)    | 182 (80)           | 1,617 (80)     | 432 (79)                | 3,575 (77)  |
| 24 months | 360 (54)            | 1,062 (58)        | 2,166 (64)          | 997 (68)         | 4,585 (62)  | 1,339 (72)    | 177 (78)           | 1,591 (78)     | 432 (79)                | 3,539 (76)  |
| 30 months | 342 (51)            | 1,056 (57)        | 2,108 (62)          | 972 (66)         | 4,478 (61)  | 1,280 (69)    | 177 (78)           | 1,570 (77)     | 416 (76)                | 3,443 (74)  |

Data are shown as n (%). † Number of participants who consented to long-term follow-up and had educational or occupational information.

Table II. Cerebrovascular risk factors of the patients included in the analysis

| Variables                                                                                                  | Educational groups |                     |                   |                     |                  | Occupational groups |               |                    |                |                         |
|------------------------------------------------------------------------------------------------------------|--------------------|---------------------|-------------------|---------------------|------------------|---------------------|---------------|--------------------|----------------|-------------------------|
|                                                                                                            | No information     | No formal education | Primary education | Secondary education | Higher education | No information      | No occupation | Non-skilled manual | Skilled manual | Manager or professional |
| Cross-sectional analysis: Patients with at least one K-MMSE score available at any time point (N=7,459)    |                    |                     |                   |                     |                  |                     |               |                    |                |                         |
| n                                                                                                          | 103 (100)          | 671 (100)           | 1,841 (100)       | 3,379 (100)         | 1,445 (100)      | 2,790 (100)         | 1,862 (100)   | 228 (100)          | 2,031 (100)    | 548 (100)               |
| Risk factors                                                                                               |                    |                     |                   |                     |                  |                     |               |                    |                |                         |
| Hypertension                                                                                               | 57 (55)            | 445 (66)            | 1,124 (61)        | 1,799 (53)          | 720 (49)         | 1601 (57)           | 1,157 (62)    | 119 (52)           | 992 (49)       | 276 (50)                |
| Diabetes mellitus                                                                                          | 21 (20)            | 168 (25)            | 455 (25)          | 764 (23)            | 310 (21)         | 651 (23)            | 477 (26)      | 48 (21)            | 431 (21)       | 111 (20)                |
| Coronary heart disease                                                                                     | 5 (5)              | 50 (8)              | 114 (6)           | 224 (7)             | 106 (7)          | 189 (7)             | 157 (8)       | 18 (8)             | 102 (5)        | 33 (6)                  |
| Atrial fibrillation                                                                                        | 3 (3)              | 79 (12)             | 226 (12)          | 303 (9)             | 117 (8)          | 322 (12)            | 204 (11)      | 13 (6)             | 138 (7)        | 51 (9)                  |
| Left ventricular hypertrophy                                                                               | 1 (1)              | 12 (2)              | 19 (1)            | 28 (1)              | 14 (1)           | 28 (1)              | 18 (1)        | 1 (0)              | 21 (1)         | 6 (1)                   |
| Peripheral artery disease                                                                                  | 1 (1)              | 7 (1)               | 14 (1)            | 26 (1)              | 2 (0)            | 21 (1)              | 16 (1)        | 1 (0)              | 9 (0)          | 3 (1)                   |
| Hyperlipidemia                                                                                             | 18 (18)            | 86 (13)             | 230 (13)          | 477 (14)            | 228 (16)         | 365 (13)            | 287 (15)      | 22 (10)            | 282 (14)       | 83 (15)                 |
| Low cholesterol                                                                                            | 1 (1)              | 14 (2)              | 91 (5)            | 102 (3)             | 33 (2)           | 102 (4)             | 78 (4)        | 6 (3)              | 47 (2)         | 8 (2)                   |
| Unruptured intracranial aneurysm                                                                           | 2 (2)              | 10 (2)              | 23 (1)            | 45 (1)              | 17 (1)           | 31 (1)              | 23 (1)        | 2 (1)              | 32 (2)         | 9 (2)                   |
| Arteriovenous malformation                                                                                 | 0 (0)              | 3 (0)               | 6 (0)             | 13 (0)              | 5 (0)            | 10 (0)              | 9 (0)         | 0 (0)              | 6 (0)          | 2 (0)                   |
| Moyamoya disease                                                                                           | 0 (0)              | 1 (0)               | 5 (0)             | 25 (1)              | 12 (1)           | 11 (0)              | 6 (0)         | 0 (0)              | 23 (1)         | 3 (1)                   |
| Obesity                                                                                                    | 13 (13)            | 72 (11)             | 183 (10)          | 410 (12)            | 207 (14)         | 293 (11)            | 215 (12)      | 31 (14)            | 252 (12)       | 94 (17)                 |
| Smoking                                                                                                    | 33 (32)            | 115 (17)            | 508 (28)          | 1,549 (46)          | 656 (45)         | 1,017 (37)          | 503 (27)      | 99 (43)            | 1,012 (50)     | 230 (42)                |
| Alcohol consumption                                                                                        | 37 (36)            | 121 (18)            | 476 (26)          | 1,490 (44)          | 760 (52)         | 965 (35)            | 501 (27)      | 115 (50)           | 1,042 (51)     | 261 (48)                |
| Longitudinal analysis: Patients classified as having cognitive impairment at baseline assessment (N=3,109) |                    |                     |                   |                     |                  |                     |               |                    |                |                         |
| n                                                                                                          | 0 (100)            | 251 (100)           | 1,015 (100)       | 1,453 (100)         | 390 (100)        | 1,410 (100)         | 758 (100)     | 95 (100)           | 702 (100)      | 144 (100)               |
| Risk factors                                                                                               |                    |                     |                   |                     |                  |                     |               |                    |                |                         |
| Hypertension                                                                                               | NA                 | 159 (63)            | 613 (60)          | 777 (54)            | 204 (52)         | 827 (59)            | 458 (60)      | 50 (53)            | 342 (49)       | 76 (53)                 |
| Diabetes mellitus                                                                                          | NA                 | 62 (25)             | 246 (24)          | 307 (21)            | 80 (20)          | 323 (23)            | 186 (25)      | 14 (15)            | 143 (20)       | 29 (20)                 |
| Coronary heart disease                                                                                     | NA                 | 20 (8)              | 57 (6)            | 94 (7)              | 30 (8)           | 100 (7)             | 57 (8)        | 7 (7)              | 32 (5)         | 5 (4)                   |
| Atrial fibrillation                                                                                        | NA                 | 34 (14)             | 131 (13)          | 150 (10)            | 35 (9)           | 192 (14)            | 92 (12)       | 5 (5)              | 51 (7)         | 8 (6)                   |
| Left ventricular hypertrophy                                                                               | NA                 | 8 (3)               | 10 (1)            | 12 (1)              | 3 (1)            | 16 (1)              | 10 (1)        | 1 (1)              | 6 (1)          | 0 (0)                   |
| Peripheral artery disease                                                                                  | NA                 | 3 (1)               | 8 (1)             | 12 (1)              | 1 (0)            | 11 (1)              | 8 (1)         | 1 (1)              | 4 (1)          | 0 (0)                   |
| Hyperlipidemia                                                                                             | NA                 | 32 (13)             | 107 (11)          | 169 (12)            | 47 (12)          | 170 (12)            | 86 (11)       | 5 (5)              | 76 (11)        | 18 (13)                 |
| Low cholesterol                                                                                            | NA                 | 6 (2)               | 52 (5)            | 39 (3)              | 6 (2)            | 53 (4)              | 29 (4)        | 2 (2)              | 18 (3)         | 1 (1)                   |
| Unruptured intracranial aneurysm                                                                           | NA                 | 4 (2)               | 12 (1)            | 24 (2)              | 8 (2)            | 17 (1)              | 13 (2)        | 1 (1)              | 12 (2)         | 5 (4)                   |
| Arteriovenous malformation                                                                                 | NA                 | 1 (0)               | 3 (0)             | 8 (1)               | 2 (1)            | 5 (0)               | 5 (1)         | 0 (0)              | 4 (1)          | 0 (0)                   |
| Moyamoya disease                                                                                           | NA                 | 1 (0)               | 3 (0)             | 14 (1)              | 3 (1)            | 8 (0)               | 3 (0)         | 0 (0)              | 9 (1)          | 1 (1)                   |
| Obesity                                                                                                    | NA                 | 26 (10)             | 86 (9)            | 145 (10)            | 46 (12)          | 128 (9)             | 71 (9)        | 12 (13)            | 69 (10)        | 23 (16)                 |
| Smoking                                                                                                    | NA                 | 36 (14)             | 261 (27)          | 607 (42)            | 160 (41)         | 444 (32)            | 188 (25)      | 40 (42)            | 336 (48)       | 56 (39)                 |
| Alcohol consumption                                                                                        | NA                 | 40 (16)             | 246 (24)          | 557 (38)            | 181 (46)         | 411 (29)            | 187 (25)      | 49 (52)            | 315 (45)       | 62 (43)                 |

Data are shown as n (%) or the mean (SD). K-MMSE: Korean version of the Mini-Mental Status Examination; NIHSS: National Institute of Health Stroke Scale; NA: not available.

Table III. Score on the Korean version of the Mini-Mental Status Examination by the four education groups and four occupation groups at eight time points

| Timepoints | Educational groups |                                  |                                |                                  |                               |          |                  | Occupational groups                         |       |                            |                                 |                             |                                      |         |                  |                                             |
|------------|--------------------|----------------------------------|--------------------------------|----------------------------------|-------------------------------|----------|------------------|---------------------------------------------|-------|----------------------------|---------------------------------|-----------------------------|--------------------------------------|---------|------------------|---------------------------------------------|
|            | N                  | No formal education <sup>a</sup> | Primary education <sup>b</sup> | Secondary education <sup>c</sup> | Higher education <sup>d</sup> | F        | Partial $\eta^2$ | Post hoc analysis <sup>†</sup> ( $P<0.05$ ) | N     | No occupation <sup>a</sup> | Non-skilled manual <sup>b</sup> | Skilled manual <sup>c</sup> | Manager or professional <sup>d</sup> | F       | Partial $\eta^2$ | Post hoc analysis <sup>†</sup> ( $P<0.05$ ) |
| 7 days     | 7,014              | 15.3 (8.6)                       | 18.3 (9.2)                     | 22.3 (8.4)                       | 25.0 (7.5)                    | 76.7***  | 0.03             | a<b<c<d                                     | 4,444 | 21.9 (7.5)                 | 23.5 (6.7)                      | 23.8 (7.0)                  | 25.6 (6.3)                           | 7.4***  | 0.01             | a=c<d, a=b=c, b=d                           |
| Discharge  | 7,120              | 16.1 (8.5)                       | 19.1 (9.0)                     | 23.6 (7.6)                       | 26.2 (6.2)                    | 108.8*** | 0.04             | a<b<c<d                                     | 4,525 | 22.9 (6.8)                 | 25.0 (5.5)                      | 25.1 (5.7)                  | 26.8 (4.8)                           | 8.2***  | 0.01             | a=c<d, a=b=c, b=d                           |
| 3 months   | 5,354              | 17.9 (8.9)                       | 21.4 (7.4)                     | 25.4 (6.1)                       | 27.7 (4.9)                    | 104.8*** | 0.06             | a<b<c<d                                     | 4,196 | 24.1 (5.6)                 | 26.5 (3.7)                      | 26.5 (4.1)                  | 28.1 (3.2)                           | 14.7*** | 0.01             | a<c<d, a=b, b=c, b=d                        |
| 6 months   | 5,014              | 18.8 (7.8)                       | 21.9 (7.3)                     | 25.9 (5.9)                       | 28.0 (4.6)                    | 92.8***  | 0.05             | a<b<c<d                                     | 4,042 | 24.5 (5.7)                 | 26.7 (4.5)                      | 27.0 (3.8)                  | 28.5 (2.8)                           | 12.9*** | 0.01             | a<c<d, a=b, b=c, b=d                        |
| 12 months  | 4,778              | 18.7 (8.1)                       | 22.1 (7.3)                     | 26.3 (5.5)                       | 28.1 (4.7)                    | 106.3*** | 0.06             | a<b<c<d                                     | 3,695 | 24.8 (5.6)                 | 26.6 (4.1)                      | 27.1 (3.8)                  | 28.6 (2.8)                           | 9.3***  | 0.01             | a<d, a=b=c, b=d, c<d                        |
| 18 months  | 4,642              | 18.2 (8.6)                       | 22.1 (7.4)                     | 26.5 (5.4)                       | 28.2 (4.7)                    | 122.9*** | 0.07             | a<b<c<d                                     | 3,575 | 24.8 (5.7)                 | 27.0 (3.8)                      | 27.2 (4.0)                  | 28.8 (2.4)                           | 13.6*** | 0.01             | a<c<d, a=b, b=c, b=d                        |
| 24 months  | 4,585              | 18.8 (8.0)                       | 22.0 (7.7)                     | 26.5 (5.4)                       | 28.1 (4.6)                    | 111.6*** | 0.07             | a<b<c<d                                     | 3,539 | 25.1 (5.6)                 | 27.1 (3.9)                      | 27.1 (4.2)                  | 28.7 (2.8)                           | 9.3***  | 0.01             | a<d, a=b=c, b=d, c<d                        |
| 30 months  | 4,478              | 18.1(8.4)                        | 22.2 (7.6)                     | 26.3 (5.6)                       | 28.2 (4.6)                    | 112.0*** | 0.07             | a<b<c<d                                     | 3,443 | 24.9 (5.9)                 | 27.0 (4.0)                      | 27.0 (4.3)                  | 29.0 (2.7)                           | 10.8*** | 0.01             | a<d, a=b=c, b=d, c<d                        |

Data are the mean (SD). †Multiple comparisons were adjusted with the Bonferroni correction. \* $P<0.05$ , \*\* $P<0.01$ , \*\*\*  $P<0.001$ .

Table IV. Frequency of cognitive impairment in each education and occupation group at eight time points

| Time points<br>after onset | N     | Educational groups  |                   |                     |                  | Total | Occupational groups |               |                    |                |                         | Total |
|----------------------------|-------|---------------------|-------------------|---------------------|------------------|-------|---------------------|---------------|--------------------|----------------|-------------------------|-------|
|                            |       | No formal education | Primary education | Secondary education | Higher education |       | N                   | No occupation | Non-skilled manual | Skilled manual | Manager or professional |       |
| MMSE<16th percentile       |       |                     |                   |                     |                  |       |                     |               |                    |                |                         |       |
| 7 days                     | 7,014 | 41.3%               | 59.2%             | 46.0%               | 28.2%            | 45.3% | 4,444               | 43.1%         | 44.2%              | 36.1%          | 27.4%                   | 38.3% |
| Discharge                  | 7,120 | 36.1%               | 55.6%             | 39.1%               | 21.2%            | 39.4% | 4,525               | 38.2%         | 33.6%              | 29.5%          | 19.7%                   | 32.0% |
| 3 months                   | 5,354 | 29.6%               | 47.8%             | 28.2%               | 11.7%            | 29.7% | 4,196               | 31.3%         | 21.1%              | 19.8%          | 11.0%                   | 23.4% |
| 6 months                   | 5,014 | 27.3%               | 45.4%             | 24.2%               | 8.4%             | 26.3% | 4,042               | 27.7%         | 18.9%              | 16.9%          | 8.1%                    | 20.2% |
| 12 months                  | 4,778 | 27.2%               | 42.5%             | 21.0%               | 8.0%             | 23.9% | 3,695               | 25.9%         | 22.8%              | 14.7%          | 6.4%                    | 18.3% |
| 18 months                  | 4,642 | 32.7%               | 41.4%             | 20.5%               | 7.4%             | 23.6% | 3,575               | 26.1%         | 17.6%              | 14.4%          | 3.9%                    | 17.7% |
| 24 months                  | 4,585 | 25.3%               | 41.9%             | 19.9%               | 7.9%             | 22.8% | 3,539               | 24.4%         | 16.4%              | 14.1%          | 4.9%                    | 17.0% |
| 30 months                  | 4,478 | 28.1%               | 40.8%             | 21.3%               | 7.2%             | 23.3% | 3,443               | 25.3%         | 17.5%              | 15.2%          | 4.6%                    | 17.8% |
| MMSE<2nd percentile        |       |                     |                   |                     |                  |       |                     |               |                    |                |                         |       |
| 7 days                     | 7,014 | 27.1%               | 41.7%             | 30.0%               | 17.0%            | 30.0% | 4,444               | 26.5%         | 22.3%              | 21.6%          | 14.7%                   | 22.7% |
| Discharge                  | 7,120 | 24.7%               | 37.5%             | 24.3%               | 11.8%            | 25.1% | 4,525               | 21.8%         | 18.8%              | 15.3%          | 9.1%                    | 17.3% |
| 3 months                   | 5,354 | 19.2%               | 27.6%             | 15.3%               | 5.8%             | 16.7% | 4,196               | 15.8%         | 8.6%               | 7.4%           | 5.2%                    | 10.5% |
| 6 months                   | 5,014 | 17.0%               | 25.2%             | 13.4%               | 5.4%             | 14.9% | 4,042               | 14.5%         | 9.0%               | 5.8%           | 3.4%                    | 9.0%  |
| 12 months                  | 4,778 | 18.8%               | 22.1%             | 11.3%               | 4.8%             | 13.1% | 3,695               | 12.2%         | 7.4%               | 5.3%           | 3.9%                    | 7.8%  |
| 18 months                  | 4,642 | 20.9%               | 23.9%             | 10.5%               | 4.5%             | 13.2% | 3,575               | 12.8%         | 7.1%               | 4.7%           | 2.3%                    | 7.6%  |
| 24 months                  | 4,585 | 17.2%               | 24.3%             | 10.5%               | 5.3%             | 13.1% | 3,539               | 12.8%         | 9.0%               | 5.7%           | 2.3%                    | 8.1%  |
| 30 months                  | 4,478 | 20.2%               | 24.1%             | 10.7%               | 5.1%             | 13.4% | 3,443               | 12.7%         | 7.3%               | 6.2%           | 2.2%                    | 8.2%  |

K-MMSE: Korean version of the Mini-Mental State Examination.

Table V. Results of logistic regression analyses predicting cognitive impairment (K-MMSE <16th percentile) after stroke at eight time points, controlling for background variables

| Groups                             | Odds ratio (95% CI) |                     |                     |                     |                     |
|------------------------------------|---------------------|---------------------|---------------------|---------------------|---------------------|
|                                    | Discharge           | 6 months            | 12 months           | 18 months           | 24 months           |
| <b>Model 1: Education</b>          |                     |                     |                     |                     |                     |
| No formal education                | 1.00 (0.81–1.30)    | 1.67 (1.19–2.35)**  | 1.67 (1.17–2.37)**  | 2.30 (1.62–3.27)*** | 1.58 (1.10–2.26)*   |
| Primary education                  | 2.81 (2.35–3.35)*** | 4.83 (3.71–6.30)*** | 4.28 (3.26–5.63)*** | 4.23 (3.18–5.63)*** | 4.34 (3.28–5.74)*** |
| Secondary education                | 2.04 (1.72–2.33)*** | 2.84 (2.22–3.63)*** | 2.47 (1.92–3.19)*** | 2.56 (1.97–3.35)*** | 2.36 (1.82–3.07)*** |
| Higher education                   | 1 (ref)             |
| <b>Model 2: Occupation</b>         |                     |                     |                     |                     |                     |
| No occupation                      | 1.76 (1.36–2.27)*** | 2.14 (1.47–3.10)*** | 2.35 (1.53–3.59)*** | 4.20 (2.50–7.06)*** | 3.07 (1.90–4.95)*** |
| Non-skilled manual                 | 1.85 (1.29–2.65)*** | 2.16 (1.32–3.53)**  | 3.51 (2.09–5.92)*** | 4.41 (2.36–8.26)*** | 3.24 (1.77–5.92)*** |
| Skilled manual                     | 1.59 (1.25–2.02)**  | 1.97 (1.37–2.82)*** | 2.11 (1.40–3.19)*** | 3.55 (2.13–5.93)*** | 2.84 (1.77–4.54)*** |
| Manager/professional               | 1 (ref)             |
| <b>Model 3: Composite CR score</b> |                     |                     |                     |                     |                     |
| Composite CR score                 | 0.73 (0.67–0.80)*** | 0.59 (0.52–0.68)*** | 0.56 (0.48–0.65)*** | 0.52 (0.45–0.61)*** | 0.56 (0.48–0.65)*** |

Controls are age, sex, initial National Institute of Health Stroke Scale score, stroke subtype, and the stroke risk factors listed in Supplementary Table I. Education and occupation were coded as dummy variables. Higher education and managerial or professional occupation were the reference groups in each model. CI: confidence interval; K-MMSE: Korean version of the Mini-Mental State Examination. \* $P < 0.05$ , \*\* $P < 0.01$ , \*\*\* $P < 0.001$ .



Table VI. Results of multi-level model analyses predicting cognitive changes during 30 months after stroke onset (exponential function)

| Variables               | Unadjusted models |                |           | Adjusted models |                |           |
|-------------------------|-------------------|----------------|-----------|-----------------|----------------|-----------|
|                         | Coefficient       | Standard error | t-ratio   | Coefficient     | Standard error | t-ratio   |
| Model 1 (N=3,109)       |                   |                |           |                 |                |           |
| Intercept 1             |                   |                |           |                 |                |           |
| Intercept 2             | 20.11             | 0.16           | 128.65*** |                 |                |           |
| Slope                   |                   |                |           |                 |                |           |
| Intercept 2             | -6.18             | 0.04           | -45.12*** |                 |                |           |
| Model 2 (N=3,109)       |                   |                |           |                 |                |           |
| Intercept 1             |                   |                |           |                 |                |           |
| Intercept 2             | 10.68             | 0.50           | 21.52***  | 13.46           | 0.49           | 27.60***  |
| Primary education       | 6.68              | 0.56           | 11.94 *** | 5.35            | 0.52           | 10.21***  |
| Secondary education     | 11.90             | 0.53           | 22.30 *** | 8.14            | 0.55           | 14.89***  |
| Higher education        | 13.52             | 0.64           | 21.15 *** | 8.72            | 0.66           | 13.16***  |
| Slope                   |                   |                |           |                 |                |           |
| Intercept 2             | -3.80             | 0.44           | -8.73***  | -5.33           | 0.46           | -11.62*** |
| Primary education       | -0.91             | 0.49           | -1.88     | -0.33           | 0.48           | -0.68     |
| Secondary education     | -3.26             | 0.48           | -6.79***  | -1.14           | 0.51           | -2.24*    |
| Higher education        | -4.50             | 0.60           | -7.57***  | -1.65           | 0.64           | -2.57**   |
| Model 3 (N=1,699)       |                   |                |           |                 |                |           |
| Intercept 1             |                   |                |           |                 |                |           |
| Intercept 2             | 21.62             | 0.22           | 97.44***  | 22.89           | 0.20           | 111.76*** |
| Non-skilled manual      | 3.88              | 0.48           | 8.06***   | 1.77            | 0.46           | 3.87***   |
| Skilled manual          | 3.30              | 0.28           | 11.82***  | 1.12            | 0.27           | 4.13***   |
| Manager or professional | 5.33              | 0.38           | 13.88***  | 2.37            | 0.41           | 5.76***   |
| Slope                   |                   |                |           |                 |                |           |
| Intercept 2             | -6.14             | 0.24           | -25.18*** | -6.91           | 0.25           | -27.17*** |
| Non-skilled manual      | -0.92             | 0.79           | -1.17     | 0.42            | 0.80           | 0.53      |
| Skilled manual          | -2.10             | 0.37           | -5.66***  | -0.79           | 0.38           | -2.10*    |
| Manager or professional | -2.97             | 0.67           | -4.45***  | -1.10           | 0.67           | -1.64     |
| Model 4 (N=1,699)       |                   |                |           |                 |                |           |
| Intercept 1             |                   |                |           |                 |                |           |
| Intercept 2             | 23.66             | 0.12           | 189.87*** | 23.65           | 0.11           | 214.38*** |
| Composite CR score      | 2.37              | 0.13           | 18.87***  | 1.23            | 0.12           | 9.92***   |
| Slope                   |                   |                |           |                 |                |           |
| Intercept 2             | -7.32             | 0.17           | -42.52*** | -7.32           | 0.16           | -44.96*** |
| Composite CR score      | -1.27             | 0.20           | -6.30***  | -0.49           | 0.21           | -2.30*    |

Adjusted models were adjusted for background variables: age, sex, initial National Institute of Health Stroke Scale score, stroke subtype, and the stroke risk factors listed in Supplementary Table I. All background variables were centered on the mean. Education and occupation were coded as dummy variables. No education and no occupation were the reference groups in models 2 and 3, respectively. \* $P < 0.05$ , \*\* $P < 0.01$ , \*\*\* $P < 0.001$ .

Table VII. Results of multi-level model analyses predicting cognitive changes during 30 months after stroke onset (piecewise regression function, unadjusted model)

| Variables               | Coefficient | Standard error | t-ratio  |
|-------------------------|-------------|----------------|----------|
| Model 1 (N=3,109)       |             |                |          |
| Intercept 1             |             |                |          |
| Intercept 2             | 14.53       | 0.16           | 92.90*** |
| Slope 1                 |             |                |          |
| Intercept 2             | 1.93        | 0.04           | 44.37*** |
| Slope 2                 |             |                |          |
| Intercept 2             | 0.02        | 0.00           | 3.97***  |
| Model 2 (N=3,109)       |             |                |          |
| Intercept 1             |             |                |          |
| Intercept 2             | 7.18        | 0.38           | 19.00*** |
| Primary education       | 5.84        | 0.46           | 12.70*** |
| Secondary education     | 9.07        | 0.44           | 20.66*** |
| Higher education        | 9.63        | 0.58           | 16.71*** |
| Slope 1                 |             |                |          |
| Intercept 2             | 1.41        | 0.16           | 9.02***  |
| Primary education       | 0.16        | 0.17           | 0.96     |
| Secondary education     | 0.71        | 0.17           | 4.21***  |
| Higher education        | 1.08        | 0.20           | 5.46***  |
| Slope 2                 |             |                |          |
| Intercept 2             | -0.03       | 0.02           | -1.59    |
| Primary education       | 0.04        | 0.02           | 1.52     |
| Secondary education     | 0.07        | 0.02           | 3.07**   |
| Higher education        | 0.06        | 0.02           | 2.55*    |
| Model 3 (N=1,699)       |             |                |          |
| Intercept 1             |             |                |          |
| Intercept 2             | 17.11       | 0.18           | 95.22*** |
| Slope 1                 |             |                |          |
| Intercept 2             | 2.16        | 0.05           | 40.63*** |
| Slope 2                 |             |                |          |
| Intercept 2             | 0.02        | 0.00           | 4.33***  |
| Model 4 (N=1,699)       |             |                |          |
| Intercept 1             |             |                |          |
| Intercept 2             | 16.09       | 0.27           | 59.66*** |
| Non-skilled manual      | 3.18        | 0.74           | 4.28***  |
| Skilled manual          | 1.46        | 0.39           | 3.77***  |
| Manager or professional | 2.84        | 0.65           | 4.35***  |
| Slope 1                 |             |                |          |
| Intercept 2             | 1.83        | 0.07           | 24.48*** |
| Non-skilled manual      | 0.17        | 0.25           | 0.68     |
| Skilled manual          | 0.61        | 0.11           | 5.42***  |
| Manager or professional | 0.74        | 0.20           | 3.64***  |
| Slope 2                 |             |                |          |
| Intercept 2             | 0.02        | 0.01           | 2.22*    |
| Non-skilled manual      | 0.01        | 0.02           | 0.88     |
| Skilled manual          | 0.00        | 0.01           | -0.12    |
| Manager or professional | 0.02        | 0.01           | 1.44     |
| Model 5 (N=1,699)       |             |                |          |
| Intercept 1             |             |                |          |
| Intercept 2             | 17.11       | 0.18           | 96.34*** |
| Composite CR score      | 1.30        | 0.20           | 6.58***  |
| Slope 1                 |             |                |          |
| Intercept 2             | 2.16        | 0.05           | 41.02*** |
| Composite CR score      | 0.33        | 0.06           | 5.39***  |
| Slope 2                 |             |                |          |
| Intercept 2             | 0.02        | 0.00           | 4.31***  |
| Composite CR score      | 0.01        | 0.00           | 1.29     |

Education and occupation were coded as dummy variables. No education and no occupation were the reference groups in each model. \* $P < 0.05$ , \*\* $P < 0.01$ , \*\*\* $P < 0.001$ .

Table VIII. Results of multi-level model analyses predicting cognitive changes during 30 months after stroke onset for young and old groups (piecewise regression function, adjusted model)

| Variables               | Young adults group (age <65years) |                |          | Old adults group (age ≥65years) |                |          |
|-------------------------|-----------------------------------|----------------|----------|---------------------------------|----------------|----------|
|                         | Coefficient                       | Standard error | t-ratio  | Coefficient                     | Standard error | t-ratio  |
| Model 1 (N=1,287/1,822) |                                   |                |          |                                 |                |          |
| Intercept 1             |                                   |                |          |                                 |                |          |
| Intercept 2             | 17.23                             | 0.24           | 72.38*** | 12.64                           | 0.20           | 64.74*** |
| Slope 1                 |                                   |                |          |                                 |                |          |
| Intercept 2             | 2.34                              | 0.07           | 35.27*** | 1.62                            | 0.06           | 28.71*** |
| Slope 2                 |                                   |                |          |                                 |                |          |
| Intercept 2             | 0.05                              | 0.01           | 9.48***  | -0.01                           | 0.01           | -1.53    |
| Model 2 (N=1,287/1,822) |                                   |                |          |                                 |                |          |
| Intercept 1             |                                   |                |          |                                 |                |          |
| Intercept 2             | 11.82                             | 1.75           | 6.75***  | 7.71                            | 0.40           | 19.17*** |
| Primary education       | 4.86                              | 1.84           | 2.65**   | 4.26                            | 0.47           | 9.02***  |
| Secondary education     | 5.45                              | 1.78           | 3.07**   | 7.04                            | 0.54           | 13.11*** |
| Higher education        | 6.10                              | 1.85           | 3.29**   | 7.46                            | 0.84           | 8.91***  |
| Slope 1†                |                                   |                |          |                                 |                |          |
| Intercept 2             | 3.79                              | 0.48           | 7.86***  | 2.26                            | 0.16           | 14.17*** |
| Primary education       | 0.48                              | 0.49           | 0.98     | 0.45                            | 0.17           | 2.67**   |
| Secondary education     | 1.01                              | 0.48           | 2.10*    | 0.70                            | 0.18           | 3.82***  |
| Higher education        | 1.14                              | 0.50           | 2.31*    | 1.19                            | 0.24           | 4.85***  |
| Slope 2†                |                                   |                |          |                                 |                |          |
| Intercept 2             | 1.15                              | 0.05           | 3.01**   | -0.03                           | 0.02           | -1.49    |
| Primary education       | -0.02                             | 0.05           | -0.35    | 0.04                            | 0.02           | 1.83     |
| Secondary education     | -0.00                             | 0.05           | -0.08    | 0.08                            | 0.03           | 3.19***  |
| Higher education        | 0.01                              | 0.05           | 0.26     | 0.05                            | 0.03           | 1.50     |
| Model 3 (N=840/859)     |                                   |                |          |                                 |                |          |
| Intercept 1             |                                   |                |          |                                 |                |          |
| Intercept 2             | 18.80                             | 0.25           | 75.35*** | 15.46                           | 0.25           | 62.90*** |
| Slope 1                 |                                   |                |          |                                 |                |          |
| Intercept 2             | 2.39                              | 0.08           | 31.86*** | 1.92                            | 0.07           | 25.86*** |
| Slope 2                 |                                   |                |          |                                 |                |          |
| Intercept 2             | 0.04                              | 0.01           | 7.60***  | -0.00                           | 0.07           | -0.12    |
| Model 4 (N=840/859)     |                                   |                |          |                                 |                |          |
| Intercept 1             |                                   |                |          |                                 |                |          |
| Intercept 2             | 18.33                             | 0.49           | 37.66*** | 15.22                           | 0.32           | 46.71*** |
| Non-skilled manual      | 2.09                              | 0.95           | 2.20*    | 1.37                            | 1.26           | 1.09     |
| Skilled manual          | 0.21                              | 0.60           | 0.35     | 0.45                            | 0.54           | 0.84     |
| Manager or professional | 1.58                              | 0.82           | 1.93     | 0.87                            | 1.41           | 0.62     |
| Slope 1†                |                                   |                |          |                                 |                |          |
| Intercept 2             | 6.43                              | 0.14           | 44.60*** | 4.52                            | 0.15           | 30.68*** |
| Non-skilled manual      | 0.23                              | 0.17           | 1.32     | 0.15                            | 0.27           | 0.55     |
| Skilled manual          | 0.28                              | 0.10           | 2.75**   | 0.38                            | 0.12           | 3.12**   |
| Manager or professional | 0.50                              | 0.15           | 3.47**   | 0.75                            | 0.27           | 2.73**   |
| Slope 2†                |                                   |                |          |                                 |                |          |
| Intercept 2             | 0.11                              | 0.02           | 6.53***  | 0.03                            | 0.02           | 1.63     |
| Non-skilled manual      | -0.00                             | 0.02           | -0.18    | 0.03                            | 0.04           | 0.69     |
| Skilled manual          | -0.00                             | 0.01           | -0.26    | -0.02                           | 0.02           | -1.19    |
| Manager or professional | 0.01                              | 0.02           | 0.73     | 0.01                            | 0.04           | 0.17     |
| Model 5 (N=840/859)     |                                   |                |          |                                 |                |          |
| Intercept 1             |                                   |                |          |                                 |                |          |
| Intercept 2             | 18.76                             | 0.24           | 76.98*** | 16.13                           | 0.23           | 55.91*** |
| Composite CR score      | 0.56                              | 0.27           | 2.04*    | 1.54                            | 0.39           | 3.95***  |
| Slope 1†                |                                   |                |          |                                 |                |          |
| Intercept 2             | 6.66                              | 0.13           | 52.18*** | 5.00                            | 0.15           | 33.11*** |
| Composite CR score      | 0.21                              | 0.05           | 4.52***  | 0.49                            | 0.08           | 6.01***  |
| Slope 2†                |                                   |                |          |                                 |                |          |
| Intercept 2             | 0.11                              | 0.02           | 7.32***  | 0.02                            | 0.02           | 1.20     |
| Composite CR score      | 0.01                              | 0.01           | 1.52     | -0.00                           | 0.01           | -0.32    |

Sample size is shown as (N=young/old). Models 2, 4, and 5 were adjusted for background variables: age, sex, initial National Institutes of Health Stroke Scale score, stroke subtype,

and the stroke risk factors listed in Supplementary Table I. All background variables were centered on the mean. Education and occupation were coded as dummy variables. No education and no occupation were the reference groups in model 2 and 4. †Slope 1 and slope 2 were adjusted for intercept 1, the initial score on the Korean version of the Mini-Mental State Examination. \* $P < 0.05$ , \*\* $P < 0.01$ , \*\*\* $P < 0.001$ .

Table IX. Results of logistic regression analyses predicting cognitive impairment after stroke at eight time points, controlling for background variables (young adults, < 65 years)

| Groups                      | Odds ratio (95% CI) |                     |                     |                      |                     |                     |                      |                      |
|-----------------------------|---------------------|---------------------|---------------------|----------------------|---------------------|---------------------|----------------------|----------------------|
|                             | 7 days              | Discharge           | 3 months            | 6 months             | 12 months           | 18 months           | 24 months            | 30 months            |
| Model 1: Education          |                     |                     |                     |                      |                     |                     |                      |                      |
| No formal education         | 0.67 (0.36–1.24)    | 0.54 (0.27–1.10)    | 2.26 (1.11–4.63)*   | 1.53 (0.63–3.68)     | 1.37 (0.56–3.34)    | 1.73 (0.74–4.05)    | 1.48 (0.54–4.08)     | 1.66 (0.64–4.31)     |
| Primary education           | 3.26 (2.47–4.30)*** | 3.79 (2.87–5.00)*** | 6.28 (4.37–9.01)*** | 7.68 (5.07–11.64)*** | 6.10 (3.99–9.33)*** | 5.33 (3.41–8.35)*** | 8.29 (5.19–13.24)*** | 6.82 (4.34–10.71)*** |
| Secondary education         | 2.04 (1.70–2.45)*** | 2.09 (1.72–2.53)*** | 2.87 (2.16–3.81)*** | 3.43 (2.43–4.83)***  | 2.55 (1.79–3.63)*** | 2.74 (1.89–3.97)*** | 3.20 (2.14–4.78)***  | 2.92 (1.99–4.27)***  |
| Higher education            | 1 (ref)             | 1 (ref)             | 1 (ref)             | 1 (ref)              | 1 (ref)             | 1 (ref)             | 1 (ref)              | 1 (ref)              |
| Model 2: Occupation         |                     |                     |                     |                      |                     |                     |                      |                      |
| No occupation               | 1.83 (1.35–2.49)*** | 2.05 (1.47–2.84)*** | 2.31 (1.53–3.50)*** | 2.41 (1.47–3.96)**   | 2.26 (1.31–3.90)**  | 4.62 (2.30–9.30)*** | 3.44 (1.74–6.82)***  | 4.03 (2.04–7.99)***  |
| Non-skilled manual          | 1.66 (1.09–2.54)*   | 1.81 (1.17–2.81)**  | 1.91 (1.12–3.26)*   | 2.18 (1.17–4.06)*    | 3.02 (1.59–5.75)**  | 4.16 (1.83–9.45)**  | 3.68 (1.65–8.23)**   | 3.79 (1.71–8.41)**   |
| Skilled manual              | 1.29 (0.99–1.67)    | 1.50 (1.13–2.00)**  | 1.78 (1.22–2.58)**  | 2.01 (1.27–3.17)**   | 1.70 (1.03–2.82)*   | 3.40 (1.74–6.62)*** | 2.84 (1.49–5.40)**   | 2.86 (1.50–5.45)**   |
| Manager/professional        | 1 (ref)             | 1 (ref)             | 1 (ref)             | 1 (ref)              | 1 (ref)             | 1 (ref)             | 1 (ref)              | 1 (ref)              |
| Model 3: Composite CR score |                     |                     |                     |                      |                     |                     |                      |                      |
| Composite CR score          | 0.74 (0.67–0.81)*** | 0.69 (0.62–0.77)*** | 0.57 (0.49–0.67)*** | 0.53 (0.44–0.64)***  | 0.55 (0.45–0.68)*** | 0.50 (0.39–0.63)*** | 0.42 (0.33–0.55)***  | 0.44 (0.34–0.57)***  |

Controls are age, sex, initial National Institute of Health Stroke Scale score, stroke subtype, and the stroke risk factors listed in Supplementary Table I. Education and occupation were coded as dummy variables. Higher education and managerial or professional occupation were the reference groups in each model. CI: confidence interval; K-MMSE: Korean version of the Mini-Mental State Examination. \* $P < 0.05$ , \*\* $P < 0.01$ , \*\*\* $P < 0.001$ .

Table X. Results of logistic regression analyses predicting cognitive impairment after stroke at eight time points, controlling for background variables (older adults,  $\geq 65$  years)

| Groups                      | Odds ratio (95% CI) |                     |                     |                     |                     |                     |                     |                     |
|-----------------------------|---------------------|---------------------|---------------------|---------------------|---------------------|---------------------|---------------------|---------------------|
|                             | 7 days              | Discharge           | 3 months            | 6 months            | 12 months           | 18 months           | 24 months           | 30 months           |
| Model 1: Education          |                     |                     |                     |                     |                     |                     |                     |                     |
| No formal education         | 0.82 (0.61–1.10)    | 0.93 (0.69–1.25)    | 1.01 (0.69–1.48)    | 1.25 (0.81–1.91)    | 1.47 (0.94–2.29)    | 2.10 (1.34–3.27)**  | 1.16 (0.78–1.79)    | 1.84 (1.16–2.93)**  |
| Primary education           | 2.05 (1.59–2.62)*** | 2.44 (1.89–3.16)*** | 2.82 (2.03–3.91)*** | 3.53 (2.45–5.10)*** | 3.56 (2.43–5.21)*** | 3.72 (2.51–5.52)*** | 2.98 (2.07–4.28)*** | 3.83 (2.57–5.74)*** |
| Secondary education         | 1.74 (1.37–2.21)*** | 1.93 (1.51–2.48)*** | 2.07 (1.50–2.86)*** | 2.63 (1.58–3.25)*** | 2.33 (1.60–3.40)*** | 2.37 (1.61–3.51)*** | 1.84 (1.28–2.63)**  | 2.70 (1.81–4.01)*** |
| Higher education            | 1 (ref)             |
| Model 2: Occupation         |                     |                     |                     |                     |                     |                     |                     |                     |
| No occupation               | 1.78 (1.15–2.75)**  | 1.76 (1.12–2.75)*   | 2.34 (1.34–4.11)**  | 2.04 (1.12–3.72)*   | 3.22 (1.50–6.88)**  | 3.95 (1.77–8.81)**  | 2.84 (1.43–5.64)**  | 3.53 (1.65–7.57)**  |
| Non-skilled manual          | 2.87 (1.54–5.36)**  | 1.83 (0.96–3.51)    | 1.84 (0.82–4.11)    | 2.02 (0.88–4.63)    | 4.04 (1.59–10.27)** | 4.11 (1.53–11.07)** | 2.43 (0.96–6.22)    | 3.20 (1.20–8.51)*   |
| Skilled manual              | 2.01 (1.29–3.12)**  | 1.76 (1.12–2.78)*   | 1.98 (1.12–3.50)*   | 1.90 (1.04–3.48)*   | 3.12 (1.46–6.67)**  | 3.52 (1.57–7.89)**  | 2.76 (1.38–5.52)**  | 3.73 (1.73–8.00)**  |
| Manager/professional        | 1 (ref)             |
| Model 3: Composite CR score |                     |                     |                     |                     |                     |                     |                     |                     |
| Composite CR score          | 0.84 (0.74–0.96)*** | 0.81 (0.71–0.93)**  | 0.72 (0.61–0.85)*** | 0.68 (0.56–0.81)*** | 0.57 (0.46–0.71)*** | 0.56 (0.45–0.70)*** | 0.69 (0.57–0.83)*** | 0.62 (0.50–0.76)*** |

Controls are age, sex, initial National Institute of Health Stroke Scale score, stroke subtype, and the stroke risk factors listed in Supplementary Table I. Education and occupation were coded as dummy variables. Higher education and managerial or professional occupation were the reference groups in each model. CI: confidence interval; K-MMSE: Korean version of the Mini-Mental State Examination. \* $P < 0.05$ , \*\* $P < 0.01$ , \*\*\* $P < 0.001$ .

Table XI. Frequency of cognitive impairment in each educational and occupational group at eight time points (cut-off=23/24)

| Time points after onset | Educational groups |                     |                   |                     |                  |       | Occupational groups |               |                    |                |                         |       |
|-------------------------|--------------------|---------------------|-------------------|---------------------|------------------|-------|---------------------|---------------|--------------------|----------------|-------------------------|-------|
|                         | N                  | No formal education | Primary education | Secondary education | Higher education | Total | N                   | No occupation | Non-skilled manual | Skilled manual | Manager or professional | Total |
| 7 days                  | 7,014              | 82.3%               | 62.1%             | 38.3%               | 21.6%            | 44.8% | 4,444               | 46.2%         | 33.0%              | 32.7%          | 19.8%                   | 36.6% |
| Discharge               | 7,120              | 79.5%               | 58.2%             | 32.2%               | 15.7%            | 39.6% | 4,525               | 41.2%         | 26.1%              | 26.5%          | 13.5%                   | 30.8% |
| 3 months                | 5,354              | 73.1%               | 50.9%             | 21.3%               | 8.9%             | 30.3% | 4,196               | 36.0%         | 16.0%              | 17.5%          | 7.0%                    | 23.4% |
| 6 months                | 5,014              | 66.9%               | 47.6%             | 18.3%               | 7.0%             | 26.9% | 4,042               | 32.4%         | 13.7%              | 14.4%          | 5.7%                    | 20.4% |
| 12 months               | 4,778              | 66.6%               | 47.2%             | 16.3%               | 6.3%             | 25.5% | 3,695               | 31.3%         | 17.8%              | 14.1%          | 5.0%                    | 19.8% |
| 18 months               | 4,642              | 66.5%               | 44.6%             | 15.9%               | 5.9%             | 24.6% | 3,575               | 30.2%         | 14.1%              | 13.5%          | 3.7%                    | 18.7% |
| 24 months               | 4,585              | 65.6%               | 45.6%             | 14.9%               | 6.8%             | 24.2% | 3,539               | 28.7%         | 14.0%              | 14.1%          | 4.8%                    | 18.5% |
| 30 months               | 4,478              | 68.4%               | 42.5%             | 16.3%               | 6.4%             | 24.3% | 3,443               | 28.8%         | 12.8%              | 14.4%          | 3.1%                    | 18.3% |

Table XII. Results of logistic regression analyses predicting cognitive impairment after stroke at eight time points, controlling for background variables (cutoff-23/24)

| Groups                      | Odds ratio (95% CI) |                      |                      |                      |                     |                       |                      |                       |
|-----------------------------|---------------------|----------------------|----------------------|----------------------|---------------------|-----------------------|----------------------|-----------------------|
|                             | 7 days              | Discharge            | 3 months             | 6 months             | 12 months           | 18 months             | 24 months            | 30 months             |
| Model 1: Education          |                     |                      |                      |                      |                     |                       |                      |                       |
| No formal education         | 7.54 (5.78–9.82)*** | 8.45 (6.51–10.98)*** | 9.79 (7.10–13.48)*** | 8.70 (6.16–12.30)*** | 9.75(6.79–13.99)*** | 10.85 (7.50–15.68)*** | 9.07 (6.34–12.98)*** | 11.17 (7.69–16.21)*** |
| Primary education           | 3.16 (2.63–3.80)*** | 3.66 (3.02–4.43)***  | 4.59 (3.55–5.92)***  | 4.96 (3.74–6.60)***  | 5.52 (4.09–7.45)*** | 5.25 (3.85–7.17)***   | 4.89 (3.63–6.58)***  | 4.53 (3.33–6.16)***   |
| Secondary education         | 1.85 (1.58–2.16)*** | 2.05 (1.73–2.43)***  | 2.14 (1.69–2.73)***  | 2.24 (1.71–2.94)***  | 2.23 (1.67–2.99)*** | 2.32 (1.71–3.13)***   | 1.85 (1.38–2.46)***  | 2.18 (1.62–2.93)***   |
| Higher education            | 1 (ref)             | 1 (ref)              | 1 (ref)              | 1 (ref)              | 1 (ref)             | 1 (ref)               | 1 (ref)              | 1 (ref)               |
| Model 2: Occupation         |                     |                      |                      |                      |                     |                       |                      |                       |
| No occupation               | 1.69 (1.30–2.20)*** | 2.92 (1.43–2.57)***  | 2.45 (1.66–3.59)***  | 2.28 (1.48–3.51)***  | 2.17 (1.35–3.50)**  | 3.52 (2.05–6.04)*     | 2.27 (1.40–3.69)***  | 3.61 (1.99–6.53)***   |
| Non-skilled manual          | 1.67 (1.14–2.43)**  | 1.84 (1.23–2.75)**   | 2.00 (1.18–3.37)**   | 1.97 (1.01–3.52)*    | 3.08 (1.70–5.60)*** | 3.41 (1.74–6.70)***   | 2.50 (1.32–4.73)**   | 3.49 (1.68–7.25)***   |
| Skilled manual              | 1.80 (1.40–2.32)*** | 2.03 (1.54–2.69)***  | 2.26 (1.55–3.31)***  | 2.09 (1.36–3.21)***  | 2.23 (1.39–3.57)*** | 3.28 (1.91–5.62)***   | 2.63 (1.62–4.26)***  | 4.16 (2.31–7.50)***   |
| Manager/professional        | 1 (ref)             | 1 (ref)              | 1 (ref)              | 1 (ref)              | 1 (ref)             | 1 (ref)               | 1 (ref)              | 1 (ref)               |
| Model 3: Composite CR score |                     |                      |                      |                      |                     |                       |                      |                       |
| Composite CR score          | 0.65 (0.59–0.71)*** | 0.59 (0.53–0.66)***  | 0.49 (0.43–0.57)***  | 0.45 (0.38–0.54)***  | 0.41 (0.34–0.50)*** | 0.39 (0.32–0.47)***   | 0.45 (0.37–0.54)***  | 0.43 (0.35–0.52)***   |

Controls are age, sex, initial National Institute of Health Stroke Scale score, stroke subtype, and the stroke risk factors listed in Supplementary Table I. Education and occupation were coded as dummy variables. Higher education and managerial or professional occupation were the reference groups in each model. CI: confidence interval; K-MMSE: Korean version of the Mini-Mental State Examination. \* $P < 0.05$ , \*\* $P < 0.01$ , \*\*\* $P < 0.001$ .



Table XIII. Results of logistic regression analyses predicting cognitive impairment (K-MMSE <16th percentile) after stroke at eight time points, controlling for background variables and recurrence

| Groups                             | Odds ratio (95% CI)  |                      |                      |                      |                      |                      |
|------------------------------------|----------------------|----------------------|----------------------|----------------------|----------------------|----------------------|
|                                    | 3 months             | 6 months             | 12 months            | 18 months            | 24 months            | 30 months            |
| <b>Model 1: Education</b>          |                      |                      |                      |                      |                      |                      |
| N†                                 | 3,674                | 2,970                | 2,442                | 2,131                | 1,876                | 1,660                |
| No formal education                | 0.96 (0.60–1.54)     | 0.91 (0.45–1.85)     | 0.84 (0.33–2.10)     | 0.91 (0.35–2.35)     | 0.51 (0.14–1.88)     | 0.74 (0.19–2.96)     |
| Primary education                  | 4.28 (3.15–5.81)***  | 6.61 (4.30–10.15)*** | 7.18 (4.28–12.07)*** | 6.05 (3.42–10.67)*** | 7.04 (3.77–13.15)*** | 9.30 (4.47–19.37)*** |
| Secondary education                | 2.43 (1.84–3.21)***  | 3.42 (2.29–5.13)***  | 3.76 (2.30–6.15)***  | 3.65 (2.14–6.24)***  | 4.06 (2.24–7.35)***  | 5.71 (2.84–11.48)*** |
| Higher education                   | 1 (ref)              |
| <b>Model 2: Occupation</b>         |                      |                      |                      |                      |                      |                      |
| N†                                 | 3,461                | 2,832                | 2,315                | 2,021                | 1,781                | 1,582                |
| No occupation                      | 2.66 (1.80–3.92)***  | 2.02 (1.25–3.28)**   | 2.68 (1.42–5.03)**   | 2.55 (1.27–5.09)**   | 4.72 (1.85–12.08)**  | 2.54 (1.11–5.81)*    |
| Non-skilled manual                 | 2.44 (1.47–4.07)***  | 3.00 (1.64–5.48)***  | 3.97 (1.89–8.33)***  | 3.30 (1.44–7.58)**   | 5.57 (1.87–16.57)**  | 4.03 (1.53–10.61)**  |
| Skilled manual                     | 2.21 (1.52–3.22)***  | 2.09 (1.31–3.34)**   | 2.70 (1.46–5.00)**   | 2.74 (1.40–5.38)**   | 5.38 (2.14–13.55)*** | 3.34 (1.49–7.45)**   |
| Manager/professional               | 1 (ref)              |
| <b>Model 3: Composite CR score</b> |                      |                      |                      |                      |                      |                      |
| N†                                 | 3,461                |                      |                      |                      |                      |                      |
| Composite CR score                 | 0.64 (0.537–0.69)*** | 0.58 (0.49–0.69)***  | 0.53 (0.43–0.65)***  | 0.58 (0.47–0.73)***  | 0.49 (0.37–0.63)***  | 0.51 (0.39–0.66)***  |

Controls are age, sex, initial National Institute of Health Stroke Scale score, stroke subtype, recurrence, and the stroke risk factors listed in Supplementary Table I. Education and occupation were coded as dummy variables. Higher education and managerial or professional occupation were the reference groups in each model. CI: confidence interval; K-MMSE: Korean version of the Mini-Mental State Examination. †Number of cases was smaller than original analysis because of missing data in recurrence. \* $P < 0.05$ , \*\* $P < 0.01$ , \*\*\* $P < 0.001$ .

Table XIV. Results of logistic regression analyses predicting cognitive impairment after stroke at eight time points, controlling for background variables and recurrence (cutoff-23/24)

| Groups                             | Odds ratio (95% CI)  |                       |                       |                       |                       |                       |
|------------------------------------|----------------------|-----------------------|-----------------------|-----------------------|-----------------------|-----------------------|
|                                    | 3 months             | 6 months              | 12 months             | 18 months             | 24 months             | 30 months             |
| <b>Model 1: Education</b>          |                      |                       |                       |                       |                       |                       |
| N†                                 | 3,674                | 2,970                 | 2,442                 | 2,131                 | 1,876                 | 1,660                 |
| No formal education                | 9.06 (5.91–13.90)*** | 17.27 (9.53–31.30)*** | 14.74 (7.47–29.08)*** | 20.04 (8.71–46.11)*** | 15.42 (6.75–35.24)*** | 18.47 (7.42–45.95)*** |
| Primary education                  | 4.76 (3.37–6.73)***  | 8.42 (5.02–14.13)***  | 8.03 (4.47–14.44)***  | 11.05 (5.22–23.42)*** | 10.90 (5.28–22.51)*** | 9.82 (4.33–22.23)***  |
| Secondary education                | 1.97 (1.41–2.75)***  | 3.27 (1.96–5.44)***   | 2.84 (1.59–5.10)***   | 4.84 (2.31–10.15)***  | 3.31 (1.61–6.81)***   | 4.04 (1.81–9.02)***   |
| Higher education                   | 1 (ref)              | 1 (ref)               | 1 (ref)               | 1 (ref)               | 1 (ref)               | 1 (ref)               |
| <b>Model 2: Occupation</b>         |                      |                       |                       |                       |                       |                       |
| N†                                 | 3,531                | 2,892                 | 2,362                 | 2,063                 | 1,819                 | 1,618                 |
| No occupation                      | 3.01 (1.86–4.87)***  | 2.75 (1.50–5.04)**    | 2.09 (1.04–4.18)*     | 2.50 (1.16–5.39)*     | 2.47 (1.02–5.99)*     | 2.30 (0.88–6.03)      |
| Non-skilled manual                 | 3.00 (1.62–5.56)***  | 3.54 (1.66–7.54)**    | 3.33 (1.43–7.75)**    | 3.69 (1.46–9.29)**    | 4.47 (1.57–12.73)**   | 3.92 (1.27–12.16)*    |
| Skilled manual                     | 2.89 (1.79–4.67)**   | 2.86 (1.57–5.23)***   | 2.52 (1.26–5.02)**    | 2.75 (1.28–5.89)**    | 3.85 (1.60–9.22)**    | 3.19 (1.23–8.28)*     |
| Manager/professional               | 1 (ref)              | 1 (ref)               | 1 (ref)               | 1 (ref)               | 1 (ref)               | 1 (ref)               |
| <b>Model 3: Composite CR score</b> |                      |                       |                       |                       |                       |                       |
| N†                                 | 3,461                | 2,832                 | 2,315                 | 2,021                 | 1,781                 | 1,582                 |
| Composite CR score                 | 0.47 (0.39–0.56)***  | 0.39 (0.30–0.49)***   | 0.42 (0.32–0.55)***   | 0.40 (0.29–0.54)***   | 0.38 (0.27–0.53)***   | 0.38 (0.27–0.55)***   |

Controls are age, sex, initial National Institute of Health Stroke Scale score, stroke subtype, recurrence, and the stroke risk factors listed in Supplementary Table I. Education and occupation were coded as dummy variables. Higher education and managerial or professional occupation were the reference groups in each model. CI: confidence interval; K-MMSE: Korean version of the Mini-Mental State Examination. †Number of cases was smaller than the original analysis because of missing data in recurrence. \* $P < 0.05$ , \*\* $P < 0.01$ , \*\*\* $P < 0.001$ .

Table XV. Results of multi-level model analyses predicting cognitive changes during 30 months after stroke onset, controlling for background variables and the initial score on the Korean version of the Mini-Mental State Examination (for the subjects without history of recurrence)

| Variables               | Coefficient | Standard error | t-ratio  |
|-------------------------|-------------|----------------|----------|
| <b>Model 1 (N=525)</b>  |             |                |          |
| Intercept 1             |             |                |          |
| Intercept 2             | 12.18       | 2.43           | 5.02***  |
| Primary education       | 5.78        | 2.47           | 2.35*    |
| Secondary education     | 7.10        | 2.46           | 2.89**   |
| Higher education        | 7.40        | 2.53           | 2.93**   |
| Slope 1†                |             |                |          |
| Intercept 2             | 6.19        | 0.44           | 13.97*** |
| Primary education       | 0.64        | 0.44           | 1.46     |
| Secondary education     | 1.21        | 0.44           | 2.76**   |
| Higher education        | 1.57        | 0.45           | 3.47**   |
| Slope 2‡                |             |                |          |
| Intercept 2             | 0.10        | 0.05           | 1.77     |
| Primary education       | -0.02       | 0.05           | -0.35    |
| Secondary education     | -0.01       | 0.05           | -0.09    |
| Higher education        | 0.00        | 0.05           | 0.02     |
| <b>Model 2 (N=505)</b>  |             |                |          |
| Intercept 1             |             |                |          |
| Intercept 2             | 19.11       | 0.43           | 43.98*** |
| Non-skilled manual      | 0.37        | 1.06           | 0.35     |
| Skilled manual          | -0.23       | 0.62           | -0.37    |
| Manager or professional | -0.27       | 0.99           | -0.28    |
| Slope 1†                |             |                |          |
| Intercept 2             | 7.07        | 0.20           | 35.91*** |
| Non-skilled manual      | -0.06       | 0.11           | -0.32    |
| Skilled manual          | 0.06        | 0.18           | 0.56     |
| Manager or professional | 0.42        | 0.01           | 2.30*    |
| Slope 2‡                |             |                |          |
| Intercept 2             | 0.09        | 0.02           | 3.90***  |
| Non-skilled manual      | 0.00        | 0.02           | 0.01     |
| Skilled manual          | -0.01       | 0.01           | -0.94    |
| Manager or professional | 0.01        | 0.02           | 0.28     |
| <b>Model 3 (N=505)</b>  |             |                |          |
| Intercept 1             |             |                |          |
| Intercept 2             | 19.02       | 0.25           | 74.87*** |
| Composite CR score      | 0.25        | 0.31           | 0.81     |
| Slope 1†                |             |                |          |
| Intercept 2             | 7.17        | 0.18           | 39.42*** |
| Composite CR score      | 0.27        | 0.06           | 4.72 *** |
| Slope 2‡                |             |                |          |
| Intercept 2             | 0.08        | 0.02           | 3.92***  |
| Composite CR score      | 0.00        | 0.01           | 0.60     |

Models were adjusted for background variables: age, sex, initial National Institute of Health Stroke Scale score, stroke subtype, and the stroke risk factors listed in Supplementary Table I. All background variables were centered on the mean. Education and occupation were coded as dummy variables. No education and no occupation were the reference groups in each model. CR: Cognitive reserve. †Slope 1 and slope 2 were adjusted for intercept 1, the initial score on the Korean version of the Mini-Mental State Examination. \* $P < 0.05$ , \*\* $P < 0.01$ , \*\*\* $P < 0.001$ .

Table XVI. Results of multi-level model analyses predicting cognitive changes during 30 months after stroke onset, controlling for background variables and the initial score on the Korean version of the Mini-Mental State Examination (cutoff-23/24)

| Variables                | Coefficient | Standard error | t-ratio  |
|--------------------------|-------------|----------------|----------|
| <b>Model 1 (N=3,107)</b> |             |                |          |
| Intercept 1              |             |                |          |
| Intercept 2              | 13.45       | 0.35           | 38.71*** |
| Primary education        | 0.11        | 0.41           | 0.28     |
| Secondary education      | 0.93        | 0.45           | 2.08*    |
| Higher education         | 0.62        | 0.64           | 0.96     |
| Slope 1†                 |             |                |          |
| Intercept 2              | 2.68        | 0.12           | 22.16*** |
| Primary education        | 0.44        | 0.11           | 3.80***  |
| Secondary education      | 0.81        | 0.12           | 6.64***  |
| Higher education         | 1.05        | 0.16           | 2.73***  |
| Slope 2†                 |             |                |          |
| Intercept 2              | 0.01        | 0.02           | 0.61     |
| Primary education        | 0.05        | 0.01           | 3.17**   |
| Secondary education      | 0.07        | 0.02           | 4.30**   |
| Higher education         | 0.05        | 0.02           | 2.50*    |
| <b>Model 2 (N=1,660)</b> |             |                |          |
| Intercept 1              |             |                |          |
| Intercept 2              | 15.96       | 0.26           | 61.41*** |
| Non-skilled manual       | 1.28        | 1.48           | 1.48     |
| Skilled manual           | 0.47        | 1.21           | 1.21     |
| Manager or professional  | 0.93        | 1.19           | 1.19     |
| Slope 1†                 |             |                |          |
| Intercept 2              | 5.17        | 0.11           | 47.50*** |
| Non-skilled manual       | 0.38        | 0.18           | 2.11*    |
| Skilled manual           | 0.36        | 0.08           | 4.41***  |
| Manager or professional  | 0.61        | 0.16           | 3.79***  |
| Slope 2†                 |             |                |          |
| Intercept 2              | 0.06        | 0.01           | 4.11***  |
| Non-skilled manual       | 0.01        | 0.02           | 0.47     |
| Skilled manual           | -0.01       | 0.01           | -0.84    |
| Manager or professional  | 0.01        | 0.02           | 0.56     |
| <b>Model 3 (N=1,630)</b> |             |                |          |
| Intercept 1              |             |                |          |
| Intercept 2              | 16.25       | 0.17           | 95.49*** |
| Composite CR score       | 0.29        | 0.25           | 1.14     |
| Slope 1†                 |             |                |          |
| Intercept 2              | 5.39        | 0.10           | 52.45*** |
| Composite CR score       | 0.36        | 0.05           | 7.00***  |
| Slope 2†                 |             |                |          |
| Intercept 2              | 0.06        | 0.01           | 4.31***  |
| Composite CR score       | 0.00        | 0.01           | 0.49     |

Models were adjusted for background variables: age, sex, initial National Institute of Health Stroke Scale score, stroke subtype, and the stroke risk factors listed in Supplementary Table I. All background variables were centered on the mean. Education and occupation were coded as dummy variables. No education and no occupation were the reference groups in each model. CR: Cognitive reserve. †Slope 1 and slope 2 were adjusted for intercept 1, the initial score on the Korean version of the Mini-Mental State Examination. \* $P < 0.05$ , \*\* $P < 0.01$ , \*\*\* $P < 0.001$ .

## References

1. Raudenbush SW, Bryk AS, Congdon R. HLM 7 for windows. Lincolnwood, IL: Scientific Software International; 2011
2. Mijajlović MD, Pavlović A, Brainin M, Heiss W-D, Quinn TJ, Ihle-Hansen HB, et al. Post-stroke dementia—a comprehensive review. *BMC medicine*. 2017;15:11
